# Supplementary material
Source: PubMed Central journal article supplement (PMC6657524)
Supplement: NIHMS1531788-supplement-Major_Resource_Table.pdf [file NIHMS1531788-supplement-Major_Resource_Table.pdf]

## Major Resources Tables

### Animals (in vivo studies)

| Species | Vendor or Source    | Background Strain | Sex  |
|---------|---------------------|-------------------|------|
| Rat     | Harlan Laboratories | Sprague-Dawley    | Male |

### Animal breeding

|                 | Species | Vendor or Source | Background Strain | Other Information |
|-----------------|---------|------------------|-------------------|-------------------|
| Parent - Male   |         |                  |                   |                   |
| Parent - Female |         |                  |                   |                   |

### Antibodies

| Target antigen   | Vendor or Source                   | Catalog # | Working concentration | Lot # (preferred but not required) |
|------------------|------------------------------------|-----------|-----------------------|------------------------------------|
| apoB             | custom manufacture by Agilent Dako |           | 0.625 ng/ul           |                                    |
| Rabbit anti-goat | Agilent                            | P0449     | 20 ug/L               |                                    |

### Cultured Cells

| Name | Vendor or Source | Sex (F, M, or unknown) |
|------|------------------|------------------------|
|      |                  |                        |
|      |                  |                        |
|      |                  |                        |
