# Supplementary material
Source: PubMed Central journal article supplement (PMC6657524)
Supplement: NIHMS1531788-supplement-Supplemental_Figure_I.pdf [file NIHMS1531788-supplement-Supplemental_Figure_I.pdf]

## SUPPLEMENTAL MATERIAL

**Figure S1:** A) Lymph flow (ml/hr); B) Triglyceride (TG) concentration (mg/ml); and C) TG output (mg/hr)

A)

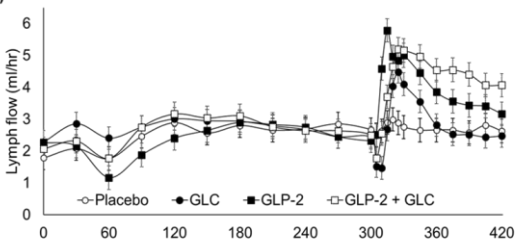

B)

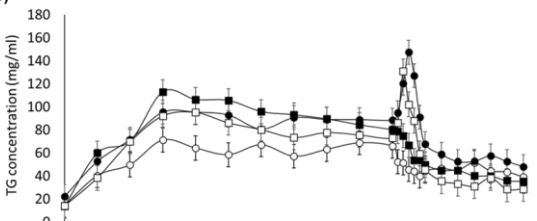

C)

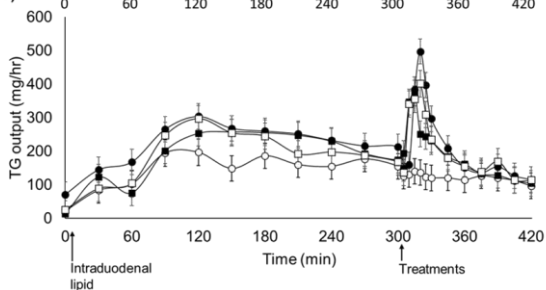

Treatments administered at 300 minutes: Placebo (open circles, n=10); glucose (GLC; closed circles, n=11); GLP-2 (closed squares, n=10); GLP-2 + glucose (GLP-2 + GLC, open squares, n=10)
